# Supplementary material
Source: PubMed Central journal article supplement (PMC5033840)
Supplement: jciinsight-1-84610-s001.pdf [file jciinsight-1-84610-s001.pdf]

**Supplemental Table 1.** Serum neutralization of HIV pseudotypes

| Subject  | Clade C    | Clade B | Clade A | Clade A/E | Clade C |       |      |      |
|----------|------------|---------|---------|-----------|---------|-------|------|------|
|          | MGRM-C-026 | 92BR020 | 94UG103 | 92TH021   | 93IN905 | JRCSE | NL43 | aMLV |
| CD4BS-01 | 38         | 93      | 50      | 25        | 107     | 57    | 851  | 19   |
| CD4BS-02 | 16         | 174     | 33      | 80        | 234     | 1190  | 4834 | 20   |
| CD4BS-03 | 186        | 96      | 15      | 12        | 248     | 109   | 372  | 15   |

Numbers refer to reciprocal dilution of IC<sub>50</sub>; green color refers to values considered positive, per details in reference 72





# Supplemental Figures

Supplemental Figure 1

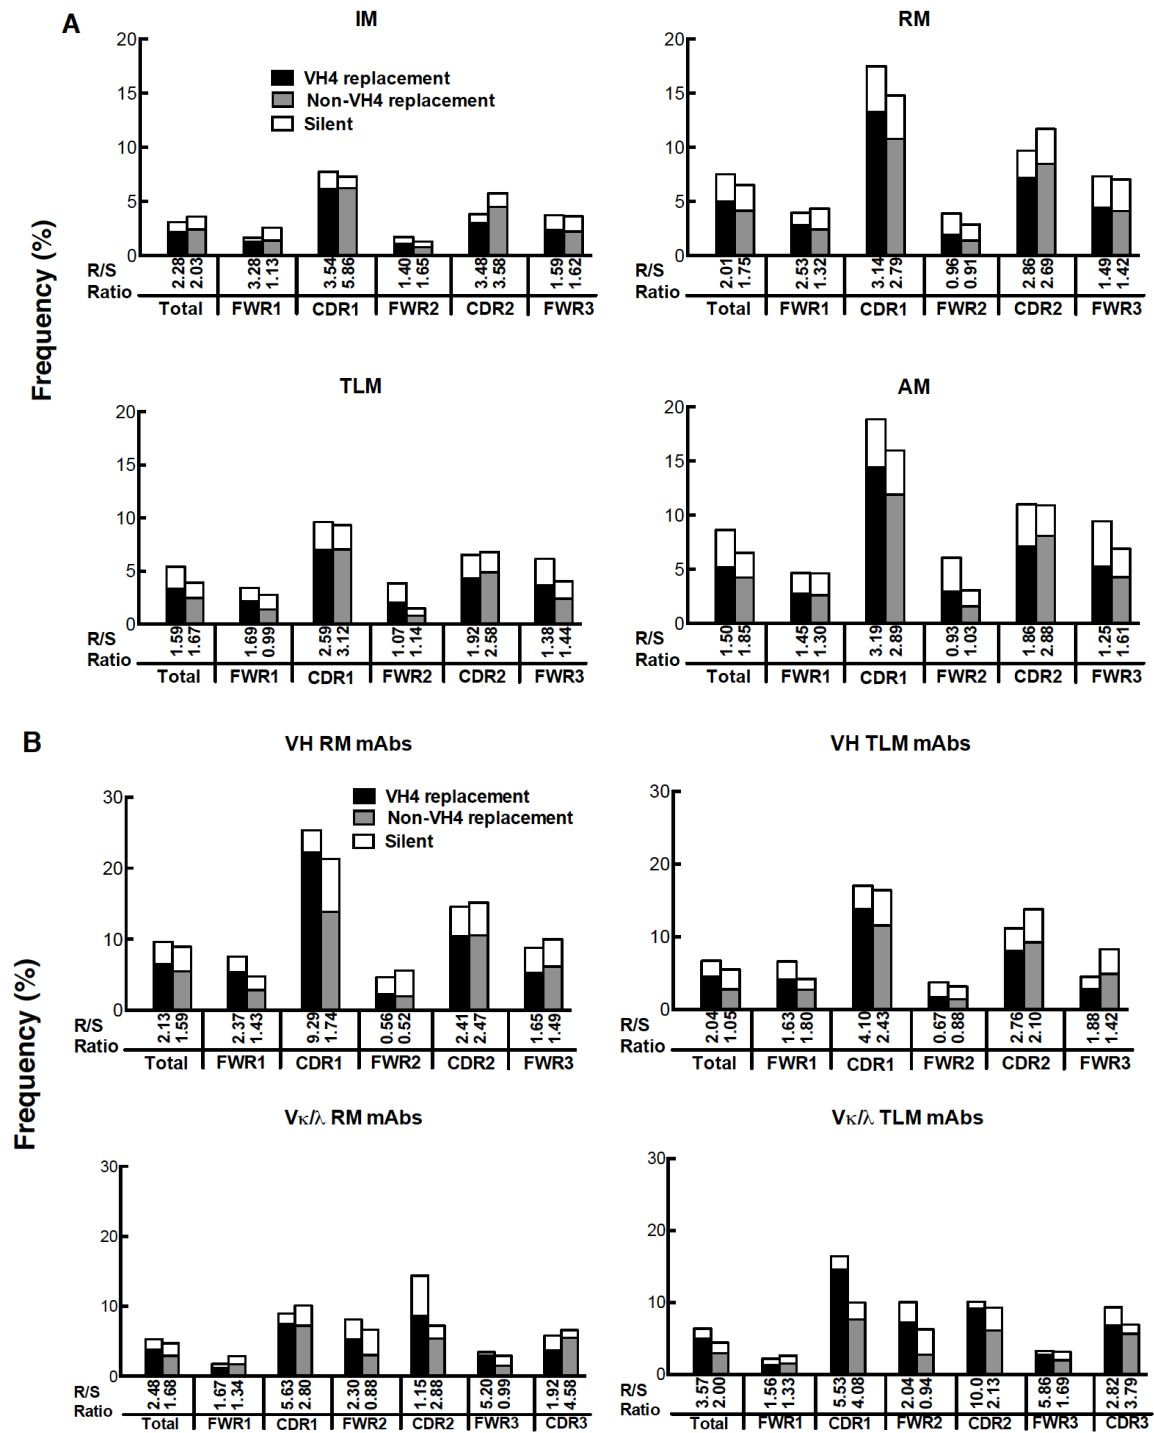

VH-based sub-analyses of R/S ratios. R/S ratios from (A) Figure 1C and (B) Figure 3C were calculated for VH4 and non-VH4 families separately.

Supplemental Figure 2

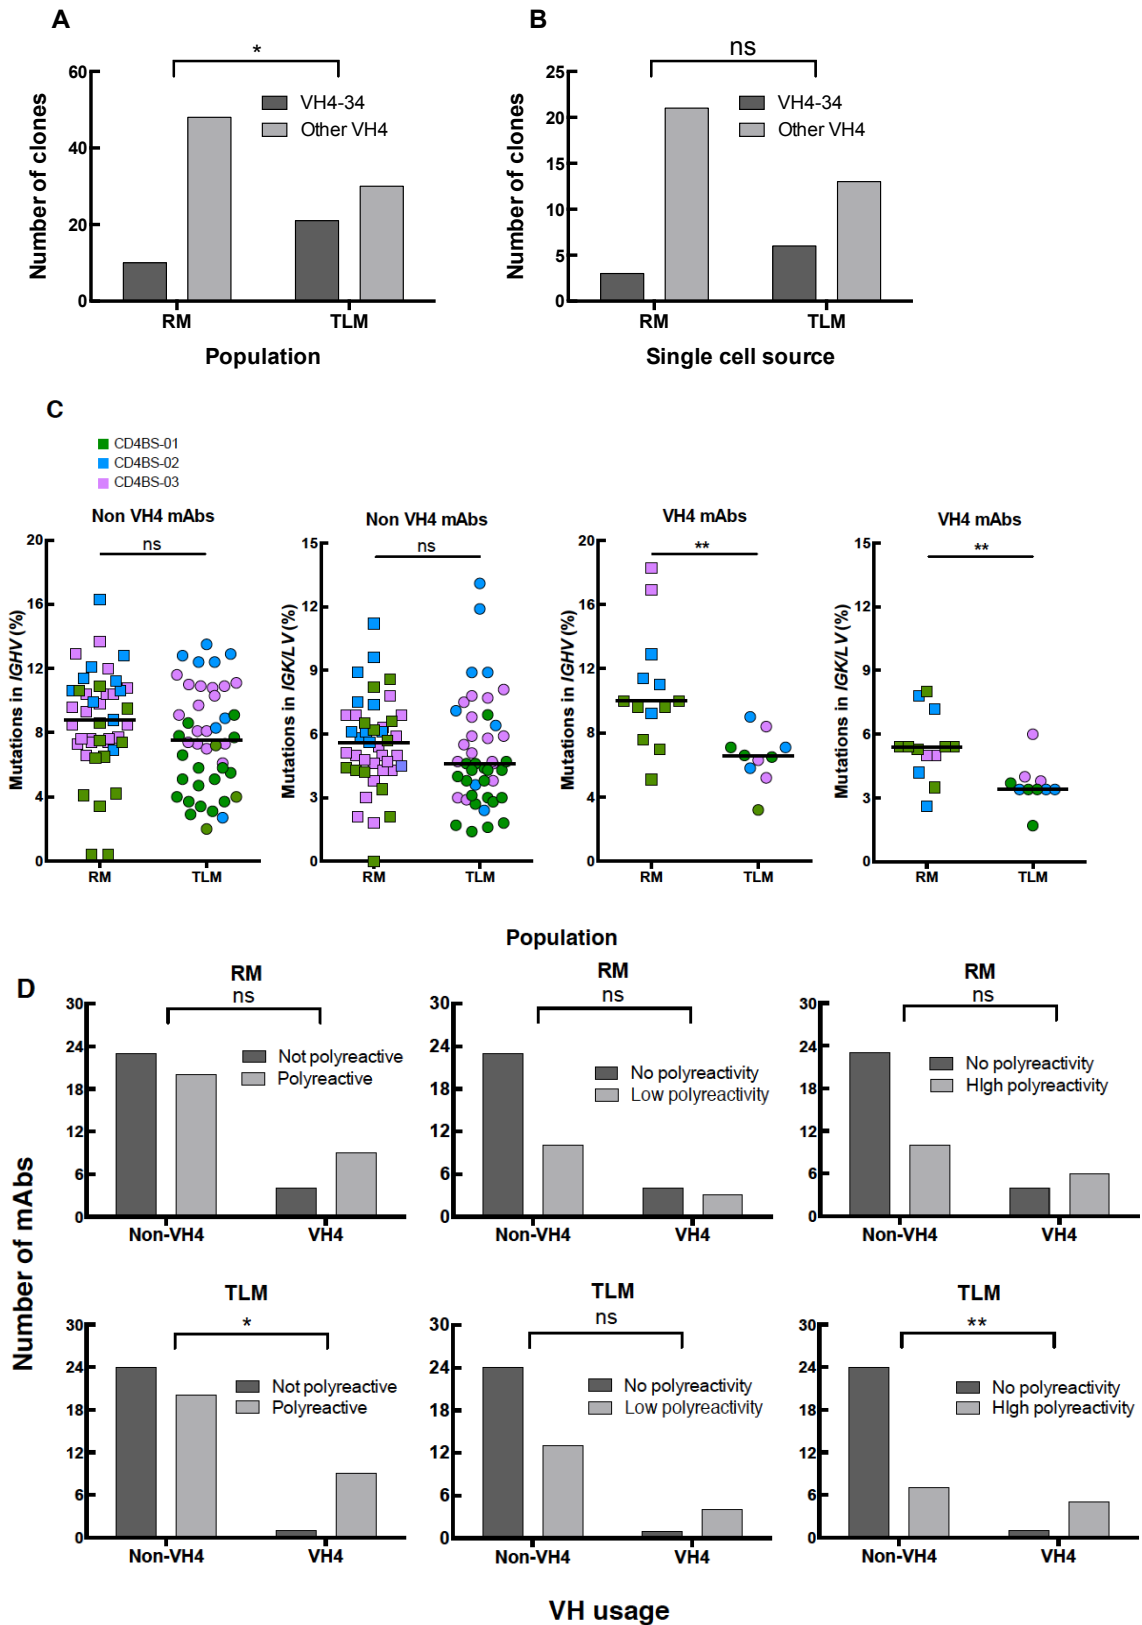

**Supplemental Figure 2.** VH-based sub-analyses of SHM frequencies, family members and polyreactivities. **(A)** Comparison of number of clones in Figure 1B belonging to VH4-34 or other VH4 family members. **(B)** Comparison as in **(A)** for clones derived from single-cell sorting. **(C)** Mutation frequencies in Figures 3A and 3B were calculated for VH4 and non-VH4 families separately. **(D)** Comparisons in Figures 7B and 7C calculated by population of mAb origin (RM or TLM). The \* denotes  $P < 0.05$ , \*\* denotes  $P < 0.01$  and ns refers to not significant ( $P > 0.05$ ).

Supplemental Figure 3

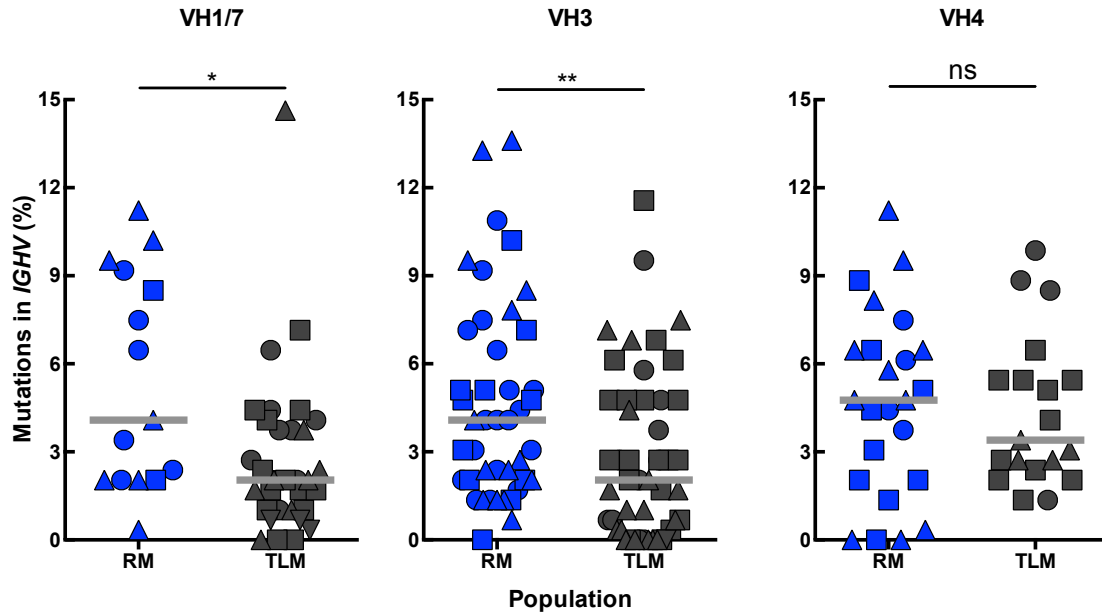

Single RM and TLM B cells were sorted from the peripheral blood of three HIV-viremic individuals (each identified by a different symbol) and variable regions within the Ig heavy chains were amplified and sequenced. Mutation frequencies were calculated from nucleotide sequences. Horizontal bars represent medians; ns refers to not significant. \* $P < 0.05$ ; \*\* $P < 0.01$  (Mann Whitney test).





Supplemental Figure 4, continued

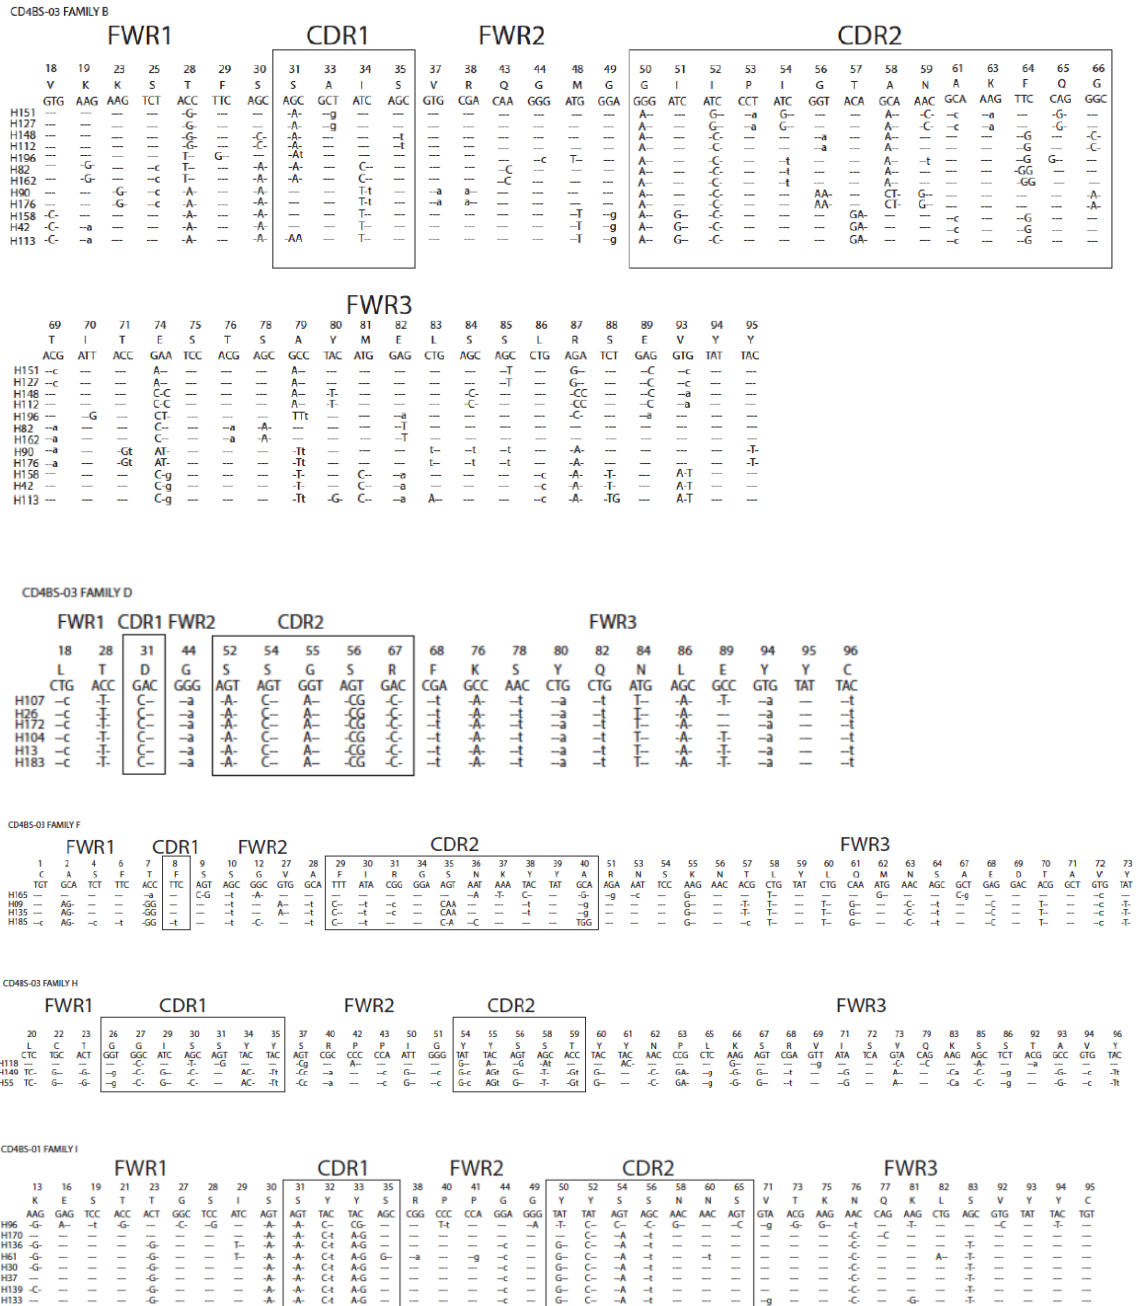

Family sequence alignment of Ig heavy chains associated with clonal trees in Figure 5.

Supplemental Figure 5

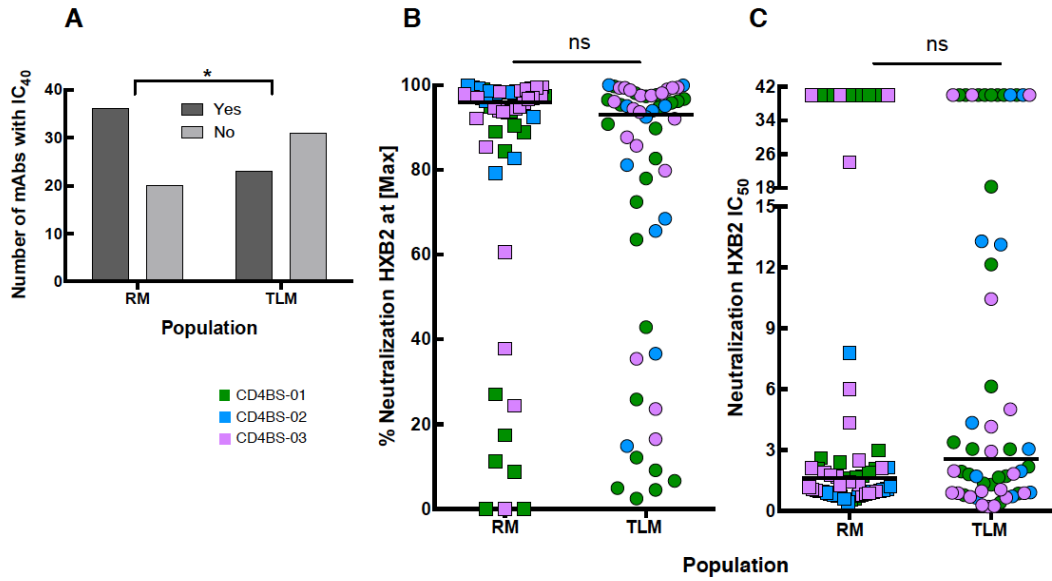

HIV neutralization analyses. **(A)** Comparison of whether 40% neutralization (IC<sub>40</sub>) with tier 2 JRFL pseudovirus was achieved (yes) or not (no). **(B)** Percent neutralization and **(C)** mAb concentration ( $\mu\text{g}/\text{mL}$ ) resulting in 50% neutralization (IC<sub>50</sub>) with tier 1 HXB2 pseudovirus. Horizontal bars represent medians and ns refers to not significant ( $P > 0.05$ ).
